# Supplementary material for: Deficiency of optineurin enhances osteoclast differentiation by attenuating the NRF2-mediated antioxidant response
Source: PubMed Central journal article supplement (PMC8102640; doi:10.1038/s12276-021-00596-w), 2021-04-16

# Table S1

**Table S1. Primer sequences used for real-time quantitative RT-PCR**

| <b>Target cDNA</b> | <b>Forward sequence (5'-3')</b> | <b>Reverse sequence (5'-3')</b> |
|--------------------|---------------------------------|---------------------------------|
| <i>β-actin</i>     | GGCTGTATTCCCCTCCATCG            | CCAGTTGGTAACAATGCCATGT          |
| <i>Ho1</i>         | AAGCCGAGAATGCTGAGTTCA           | GCCGTGTAGATATGGTACAAGGA         |
| <i>Nqo1</i>        | AGGATGGGAGGTACTIONCGAATC        | AGGCGTCCTTCCTTATATGCTA          |
| <i>Gclc</i>        | GGGGTGACGAGGTGGAGTA             | GTTGGGGTTTGTCTCTCCC             |
| <i>Gclm</i>        | AGGAGCTTCGGGACTGTATCC           | GGGACATGGTGCATTCCAAAA           |
| <i>Srx</i>         | ATCGTGGTGCTGGATTGATTC           | CACCCCAGAGATAAGATTACCCA         |
| <i>Nfatc1</i>      | GACCCGGAGTTCGACTTCG             | TGACACTAGGGGACACATAACTG         |
| <i>c-Fos</i>       | CGGGTTTCAACGCCGACTA             | TTGGCACTAGAGACGGACAGA           |
| <i>Trap</i>        | AGCAGCCAAGGAGGACTACGTT          | TCGTTGATGTCGCACAGAGG            |
| <i>Ctsk</i>        | AGGGAAGCAAGCACTGGATA            | GCTGGCTGGAATCACATCTT            |

**Figure S1**

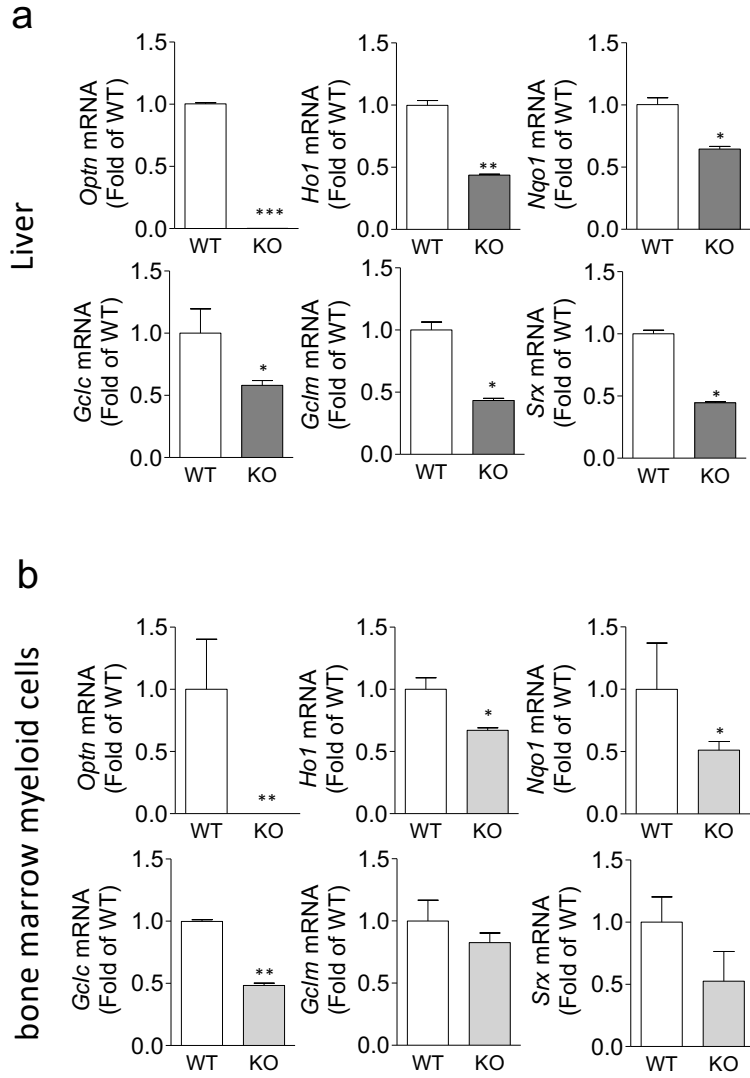

# Figure S2

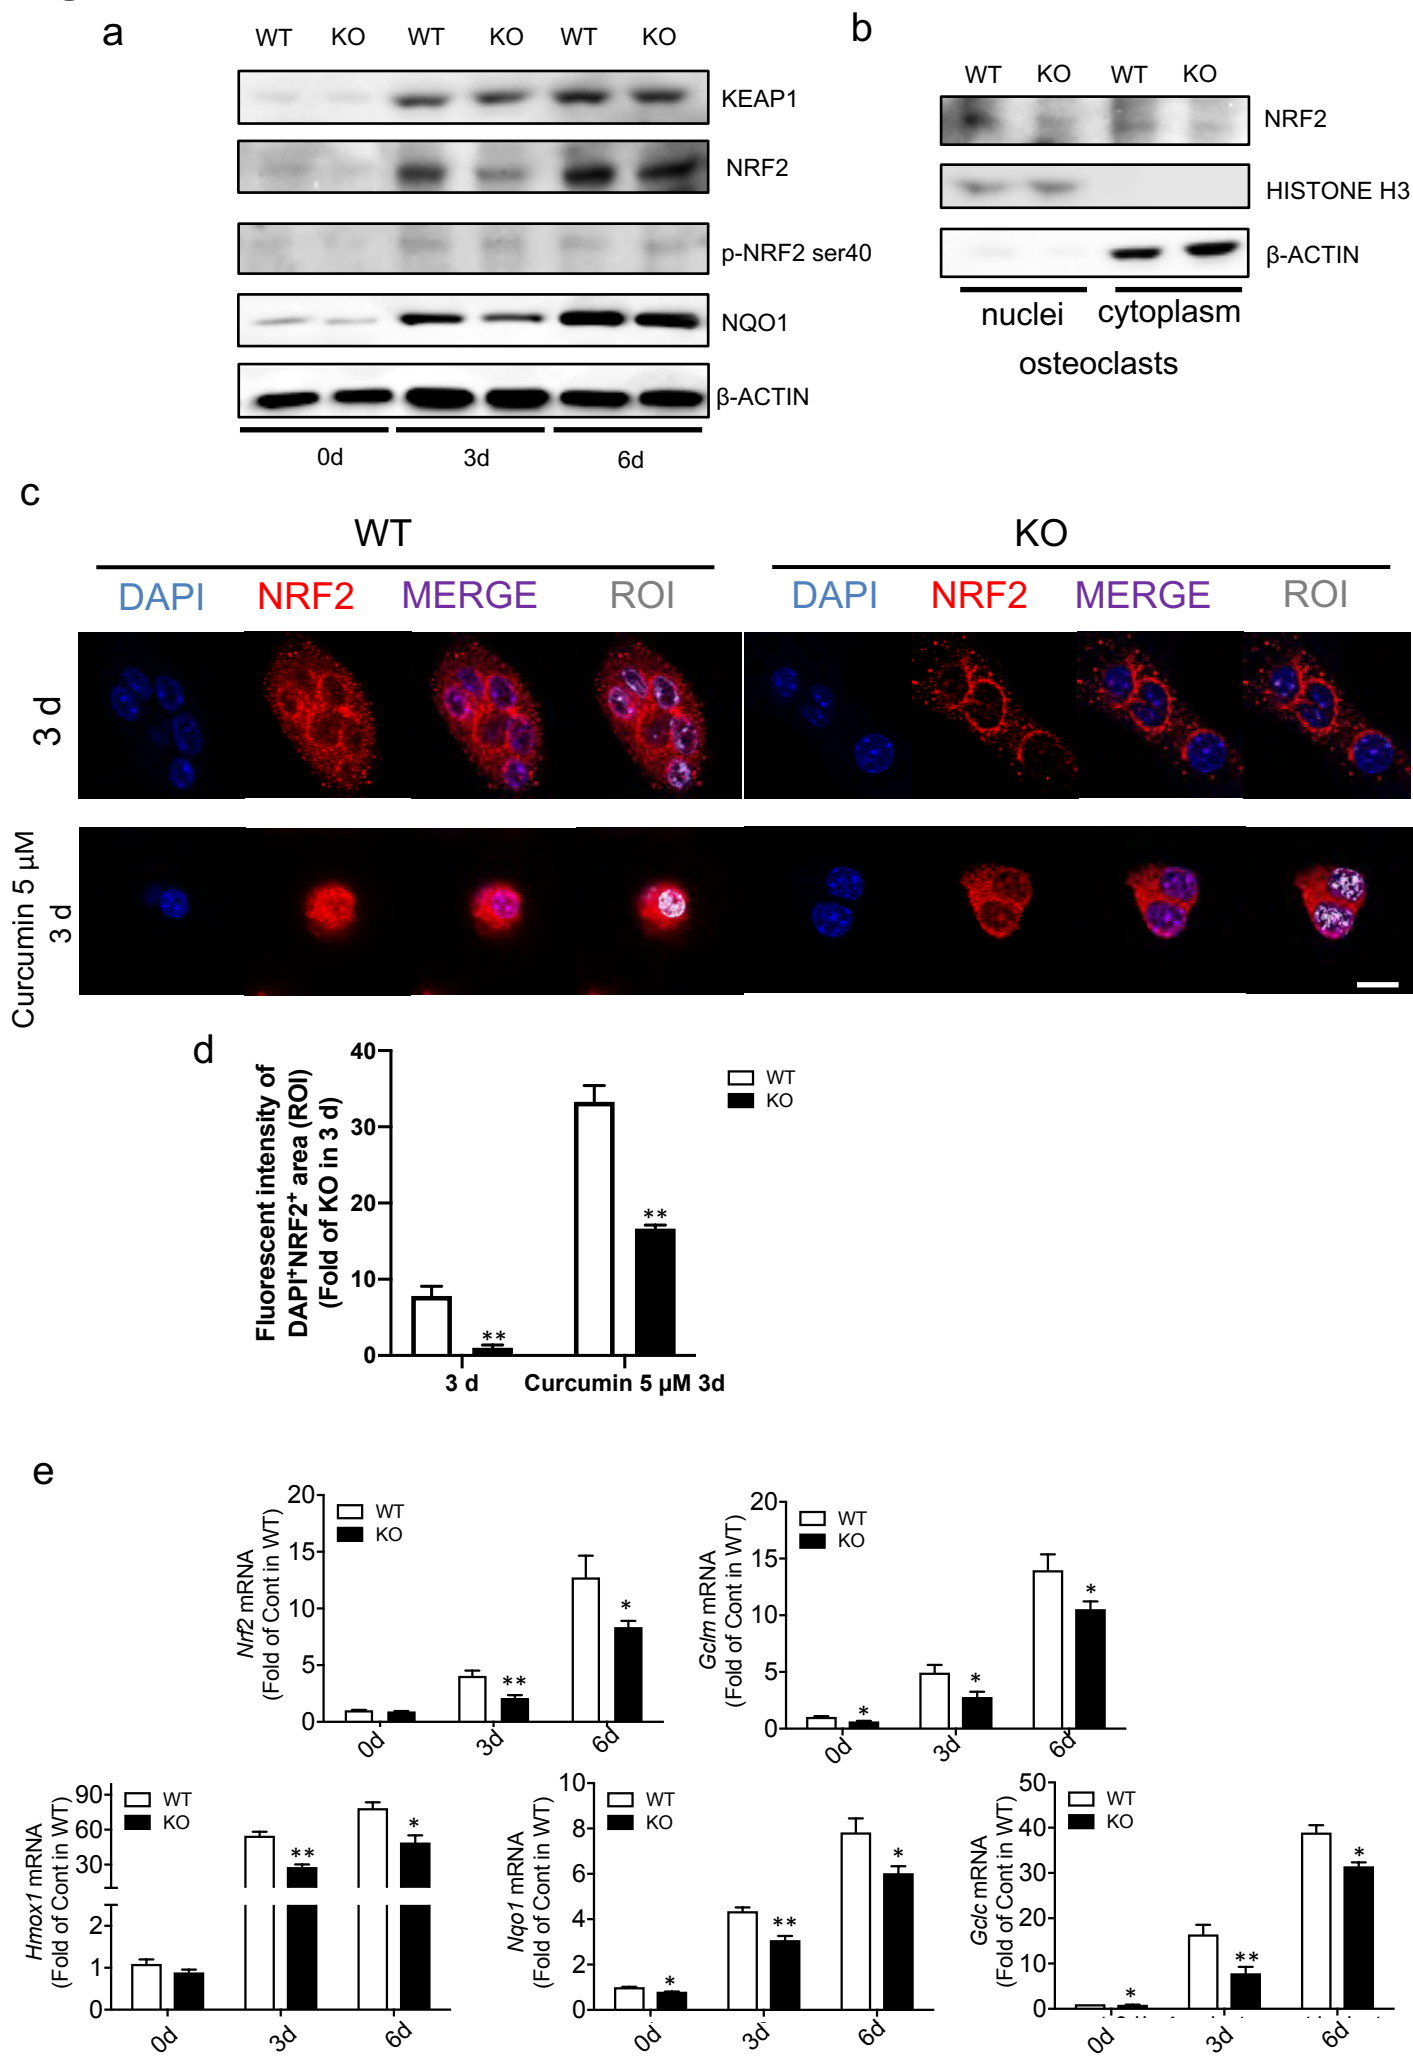

# Figure S3

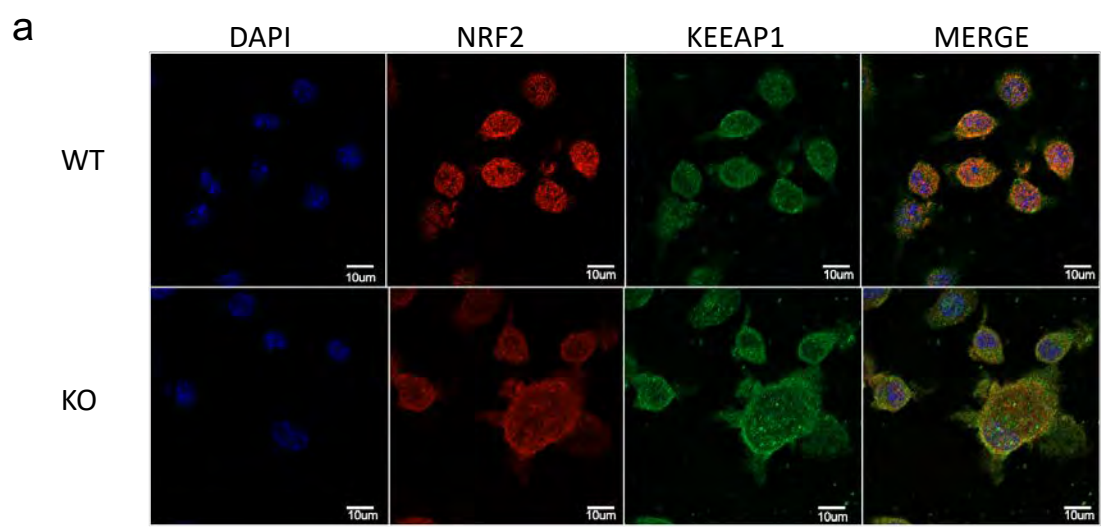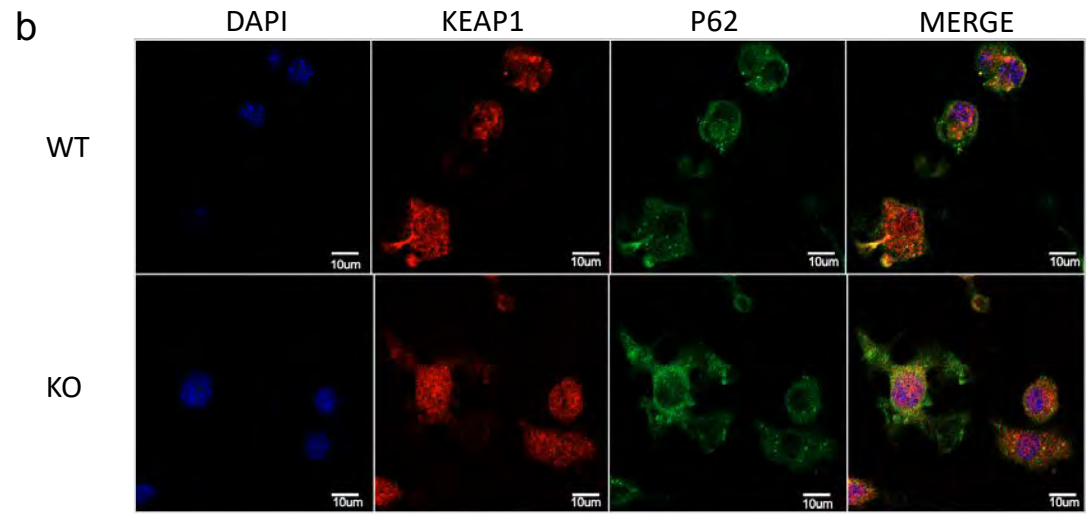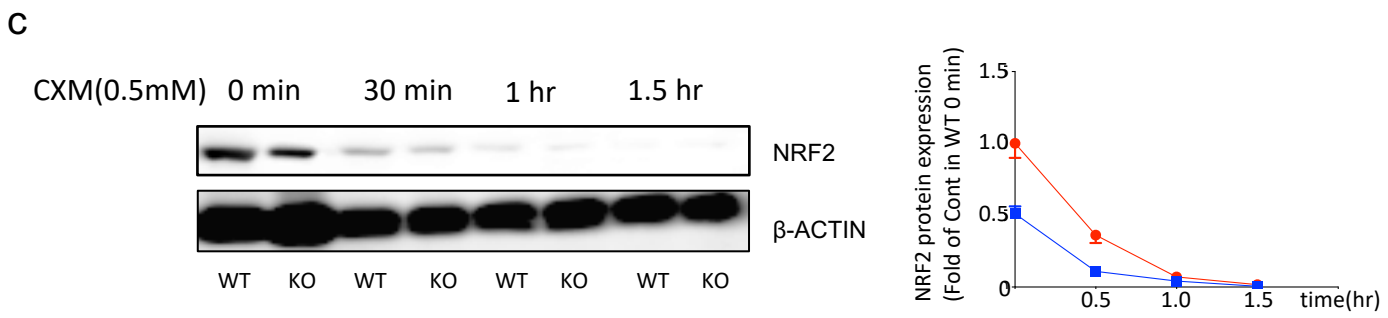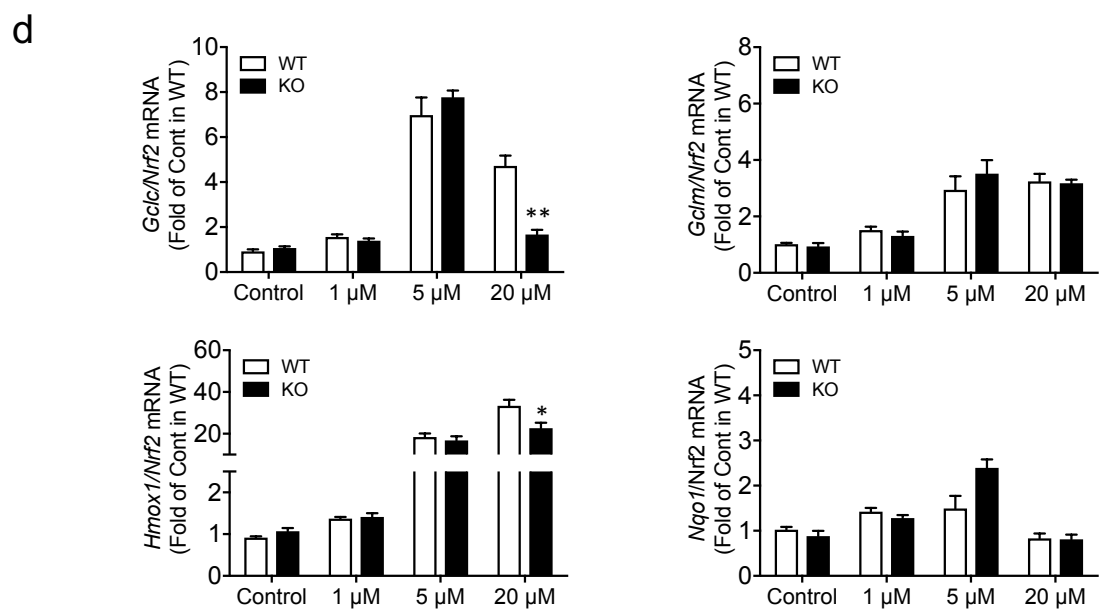

**Figure S4**

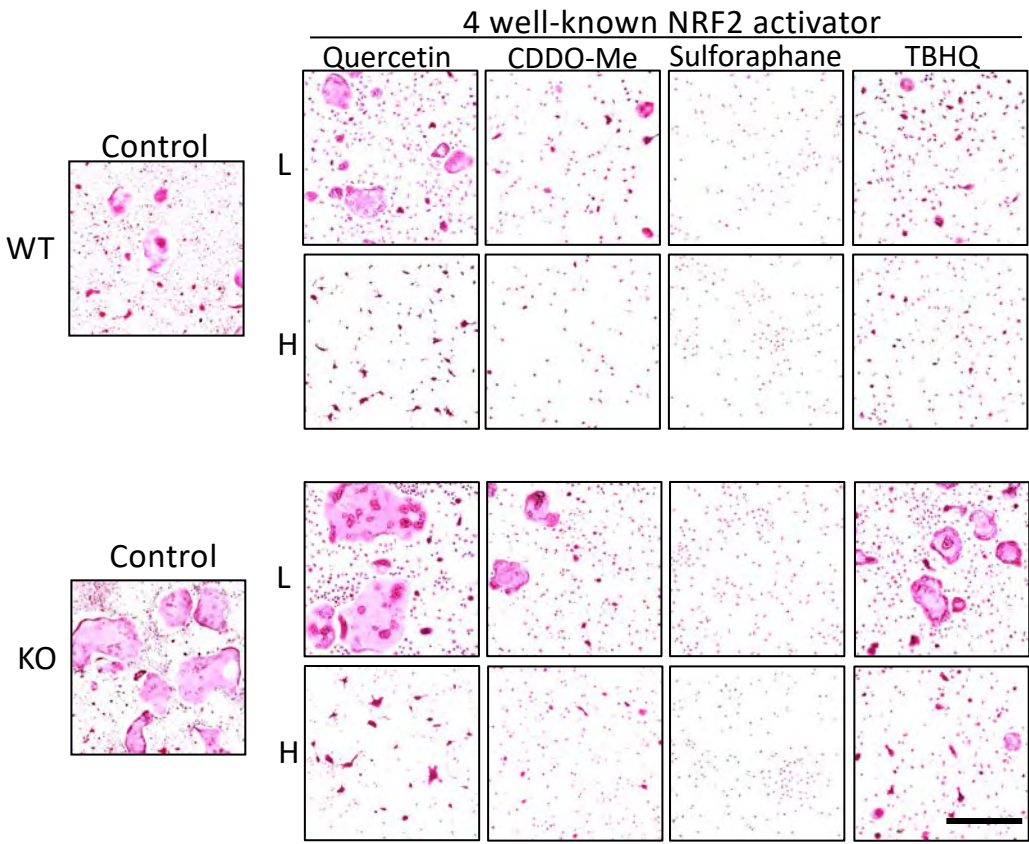

Supplement: 12276_2021_596_MOESM1_ESM.pdf [file 12276_2021_596_MOESM1_ESM.pdf]
